# Supplementary material for: Comparative magnitude and persistence of SARS-CoV-2 vaccination responses on a population level in Germany
Source: bioRxiv or medRxiv preprint supplement (doi:10.1101/2021.12.01.21266960), 2021-12-05
Supplement: Supplementary file [file media-1.pdf]

1 **Supplementary information - Comparative magnitude and persistence of SARS-CoV-2**  
2 **vaccination responses on a population level in Germany**

3  
4 Alex Dulovic (PhD)<sup>1,#</sup>, Barbora Kessel (PhD)<sup>2,#</sup>, Manuela Harries (MSc)<sup>2,#</sup>, Matthias Becker (MSc)<sup>1</sup>,  
5 Julia Ortmann (BSc)<sup>2</sup>, Johanna Griesbaum<sup>1</sup>, Jennifer Jüngling<sup>1</sup>, Daniel Junker (MSc)<sup>1</sup>, Pilar Hernandez  
6 (PhD)<sup>2</sup>, Daniela Gornyk (MSc)<sup>2</sup>, Stephan Glöckner (PhD)<sup>2</sup>, Vanessa Melhorn (PhD)<sup>2</sup>, Stefanie Castell  
7 (MD)<sup>2</sup>, Jana-Kristin Heise (MSc)<sup>2</sup>, Yvonne Kemmling (MD)<sup>2</sup>, Torsten Tonn (Prof)<sup>3</sup>, Kerstin Frank  
8 (PhD)<sup>3</sup>, Thomas Illig (Prof)<sup>4</sup>, Norman Klopp (PhD)<sup>4</sup>, Neha Warikoo (PhD)<sup>2</sup>, Angelika Rath<sup>2</sup>, Christina  
9 Suckel (MSc)<sup>2</sup>, Anne Ulrike Marzian<sup>2</sup>, Nicole Grupe<sup>2</sup>, Philipp D. Kaiser (PhD)<sup>1</sup>, Bjoern Traenkle  
10 (PhD)<sup>1</sup>, Ulrich Rothbauer (Prof)<sup>1,5</sup>, Tobias Kerrinnes (PhD)<sup>6</sup>, Gérard Krause (Prof)<sup>2,7,8</sup>, Berit Lange  
11 (MD)<sup>2,8,§,\*</sup>, Nicole Schneiderhan-Marra (PhD)<sup>1,§,\*</sup>, Monika Strengert (PhD)<sup>2,7,§,\*</sup>

12  
13 <sup>1</sup> NMI Natural and Medical Sciences Institute at the University of Tübingen, Reutlingen, Germany

14 <sup>2</sup> Helmholtz Centre for Infection Research, Braunschweig, Germany

15 <sup>3</sup> Institute of Transfusion Medicine and Immunohematology, German Red Cross, Plauen, Germany

16 <sup>4</sup> Hannover Unified Biobank, Hannover Medical School, Hannover, Germany

17 <sup>5</sup> Pharmaceutical Biotechnology, University of Tübingen, Germany

18 <sup>6</sup> Helmholtz Institute for RNA-based Infection Research, Würzburg, Germany

19 <sup>7</sup> TWINCORE, Centre for Experimental and Clinical Infection Research, a joint venture of the Hannover  
20 Medical School and the Helmholtz Centre for Infection Research, Hannover, Germany

21 <sup>8</sup> German Centre for Infection Research (DZIF), partner site Hannover-Braunschweig, Germany

22  
23 #, § these authors contributed equally to this work.

24 \* corresponding authors.

25  
26 Corresponding authors contact details:

27 Monika Strengert, Phone number: +49(0)53161813103, Email address: [monika.strengert@helmholtz-](mailto:monika.strengert@helmholtz-hzi.de)  
28 [hzi.de](mailto:monika.strengert@helmholtz-hzi.de), Postal address: Inhoffenstraße 7, 38124 Braunschweig, Germany.

29 Berit Lange, Phone number: +49(0)53161813110, Email address: [berit.lange@helmholtz-hzi.de](mailto:berit.lange@helmholtz-hzi.de), Postal  
30 address: Inhoffenstraße 7, 38124 Braunschweig, Germany.

31 Nicole Schneiderhan-Marra, Phone number: +49(0)712151530815, Email address:  
32 [nicole.schneiderhan@nmi.de](mailto:nicole.schneiderhan@nmi.de), Postal address: Markwiesenstraße 55, 72770 Reutlingen, Germany.

33

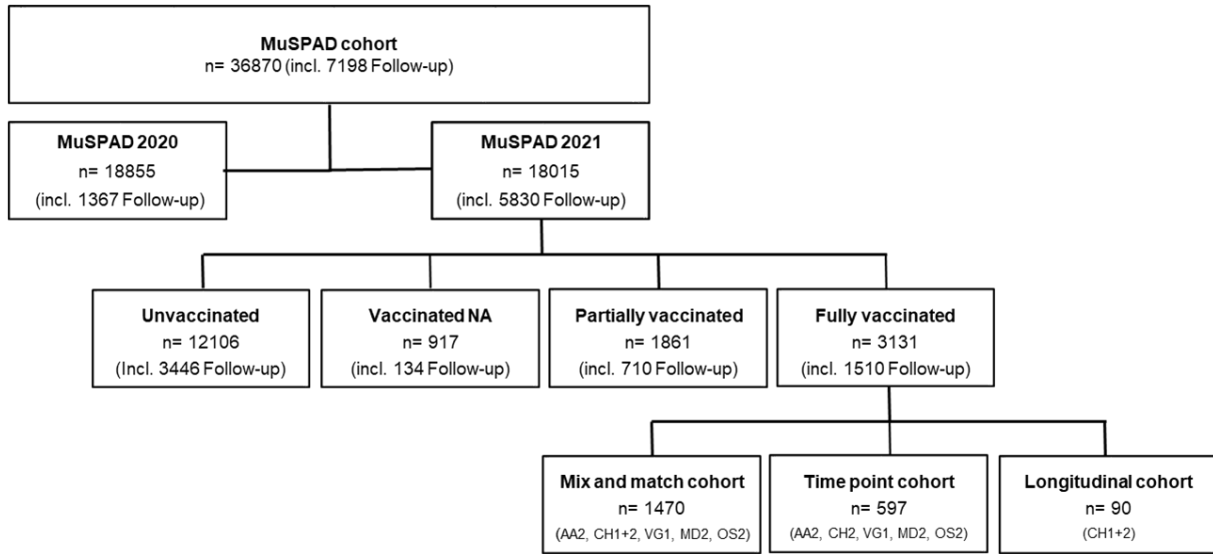35  
3637 **Fig. S1. Flow chart for sample selection from MuSPAD cohort.**

38 Sample selection for our vaccine response study from the entire MuSPAD cohort is displayed in a flow chart.  
39 Samples were selected based on selection criteria outlined in method section to examine impact of vaccination  
40 scheme, length and persistence of antibody response. Samples originated from the following study locations:  
41 Aachen 2 (AA2), Chemnitz 1(CH1), Chemnitz 2 (CH2), Vorpommern-Greifswald 1 (VG1), Osnabrück 2 (OS2),  
42 and Magdeburg 2 (MD2). Number of participants is given per group (n), NA: not available.  
43

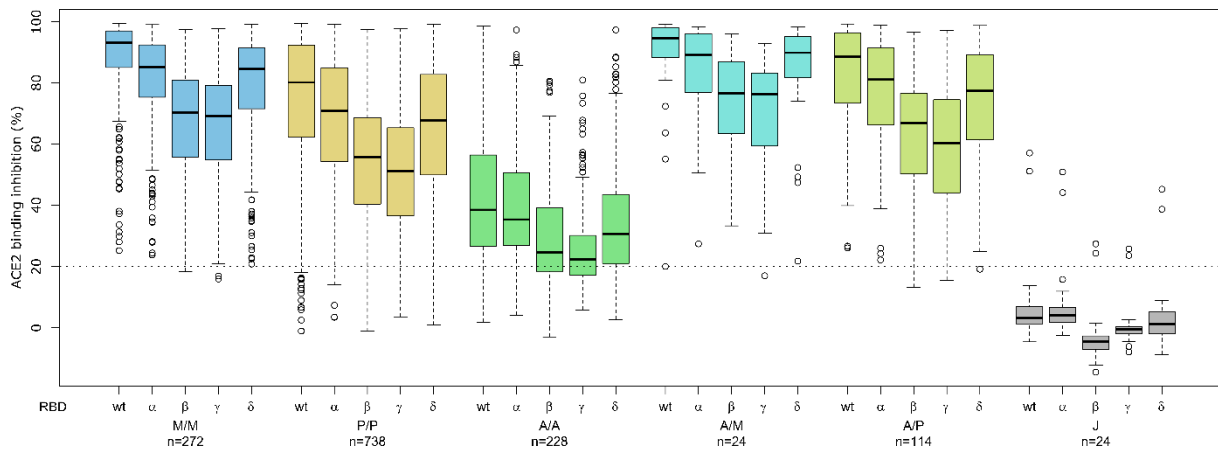

44

45 **Fig. S2. Different VoCs reduce antibody ACE2 binding inhibition comparably between SARS-CoV-2**  
46 **vaccination schemes.**

47 ACE2 binding inhibition against the SARS-CoV-2 VoC Alpha (B.1.1.7), Beta (B.1.351), Gamma (P1) and Delta  
48 (B.1.617.2) RBDs was assessed by an ACE2-RBD competition assay for homologous mRNA (mRNA-1273  
49 (M/M, blue), BNT162b2 (P/P, orange)), heterologous prime-boost (AZD1222-mRNA-1273 (A/M, light blue),  
50 AZD1222-BNT162b2 (A/P, light green) or vector-based (AZD1222-AZD1222 (A/A, green), Ad26.CoV2.S (J,  
51 grey))vaccination schemes in the mix and match cohort. SARS-CoV-2 RBD WT (Figure 3) is again shown for  
52 clarity and comparison. Data is shown as box and whisker plots. Boxes represent medians, 25th and 75th  
53 percentiles and whiskers show the largest and smallest non-outlier values based on 1.5 IQR calculation. Outlier  
54 values are shown in clear circles. The threshold for non-responsive samples (ACE2 binding inhibition less than  
55 20%) is shown as dotted line. All samples below this can be considered non-responsive. Number of samples per  
56 vaccination scheme are stated below the figure.

57

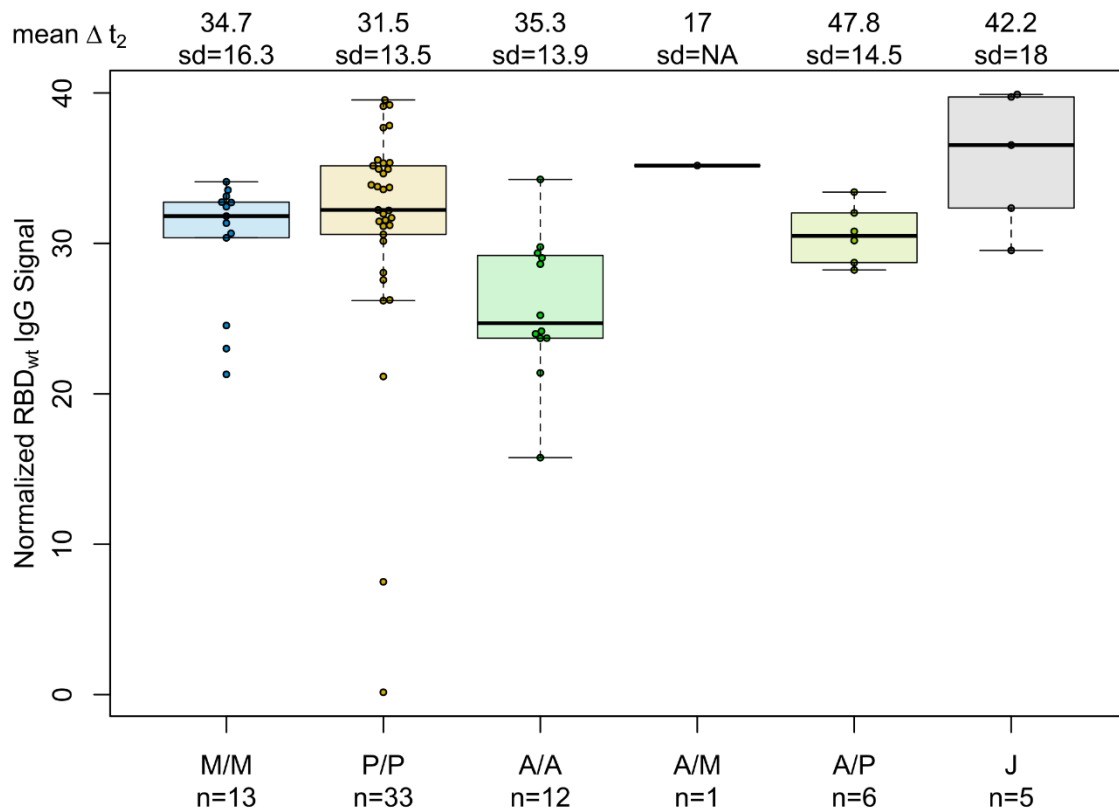

58

59 **Fig. S3. SARS-CoV-2 vaccination boosts humoral response among recovered individuals independent of**  
 60 **vaccination scheme.**

61 Differences in vaccination responses of recovered previously SARS-CoV-2 infected individuals from our mix and  
 62 match cohort were analysed using MULTICOV-AB. SARS-CoV-2 infection status was based on a previous self-  
 63 reported positive PCR/antigen test or a MULTICOV-AB nucleocapsid IgG normalisation ratio above 1. Samples  
 64 were split according to vaccination scheme (homologous mRNA (mRNA-1273 (M/M, blue), BNT162b2 (P/P,  
 65 orange)), heterologous prime-boost (AZD1222-mRNA-1273 (A/M, light blue), AZD1222-BNT162b2 (A/P, light  
 66 green) or vector-based (AZD1222-AZD1222 (A/A, green), Ad26CoV2.S (J, grey)). Boxes represent medians, 25th  
 67 and 75th percentiles and whiskers show the largest and smallest non-outlier values based on 1.5 IQR calculation.  
 68 When less than 5 were available per group, only the median is indicated by a line. Time between sampling and  
 69 full vaccination is displayed as mean and SD for each group. Number of samples per vaccination scheme are stated  
 70 below the figure. Results of a formal statistical comparison of recovered-vaccinated and SARS-CoV-2 naïve-  
 71 vaccinated individuals is shown in Table S6.

72

73 **Table S1.** Comorbidities in study participants (n. a.: not applicable; NA: not available; CVD: cardiovascular  
74 disease).

| Sample cohort (n)      | SARS-CoV-2 infection status (n) * | ΔT post-vaccination (days) | Vaccine (n)     | Hypertension (n, %)    | CVD (n, %) | Diabetes (n, %) | Lung disease (n, %) | Cancer (n, %) | Immuno-suppression (n, %) |           |
|------------------------|-----------------------------------|----------------------------|-----------------|------------------------|------------|-----------------|---------------------|---------------|---------------------------|-----------|
| Mix and match (1470)   | + (70)                            | 7-65                       | M/M (13)        | 4 (30.8)               | 1 (7.69)   | 2 (15.4)        | 0 (0)               | 0 (0)         | 0 (0)                     |           |
|                        |                                   |                            | P/P (33)        | 12 (36.0)              | 4 (12.0)   | 3 (9.10)        | 0 (0)               | 0 (0)         | 1 (3.0)                   |           |
|                        |                                   |                            | A/A (33)        | 7 (58.3)               | 3 (25.0)   | 2 (16.67)       | 1 (8.30)            | 1 (8.30)      | 2 (16.7)                  |           |
|                        |                                   |                            | A/M (1)         | 1 (100)                | 0 (0)      | 0 (0)           | 0 (0)               | 0 (0)         | 0 (0)                     |           |
|                        |                                   |                            | A/P (6)         | 3 (50.0)               | 1 (16.7)   | 0 (0)           | 1 (16.7)            | 0 (0)         | 0 (0)                     |           |
|                        |                                   |                            | J (5)           | 2 (40.0)               | 0 (0)      | 0 (0)           | 0 (0)               | 0 (0)         | 1 (20.0)                  |           |
|                        | - (1400)                          |                            |                 | M/M (272)              | 84 (30.9)  | 23 (8.46)       | 13 (4.78)           | 17 (6.25)     | 2 (0.74)                  | 11 (4.04) |
|                        |                                   |                            |                 | P/P (734, 4 NA)        | 263 (35.8) | 101 (13.8)      | 64 (8.72)           | 59 (8.04)     | 20 (2.72)                 | 37 (5.04) |
|                        |                                   |                            |                 | A/A (228)              | 91 (39.9)  | 25 (11.1)       | 25 (11.0)           | 12 (5.26)     | 2 (0.88)                  | 9 (3.95)  |
|                        |                                   |                            |                 | A/M (24)               | 12 (50.0)  | 4 (16.7)        | 2 (8.34)            | 0 (0)         | 1 (4.16)                  | 0 (0)     |
|                        |                                   |                            |                 | A/P (114)              | 43 (37.7)  | 16 (14.0)       | 10 (8.77)           | 10 (8.77)     | 4 (3.51)                  | 6 (5.26)  |
|                        |                                   |                            |                 | J (24)                 | 9 (37.50)  | 2 (8.30)        | 2 (8.30)            | 2 (8.30)      | 1 (4.16)                  | 2 (8.30)  |
|                        |                                   |                            |                 |                        |            |                 |                     |               |                           |           |
| Time points (597)      | -                                 | 5-12                       | P/P (107)       | 50 (46.7)              | 16 (15.0)  | 6 (5.61)        | 3 (2.80)            | 0 (0)         | 7 (6.50)                  |           |
|                        |                                   |                            | M/M (40)        | 13 (32.50)             | 3 (7.50)   | 3 (7.50)        | 1 (2.50)            | 0 (0)         | 1 (2.50)                  |           |
|                        |                                   | 26-30                      | P/P (102; 1 NA) | 31 (30.4)              | 15 (14.7)  | 11 (10.8)       | 12 (11.8)           | 0 (0)         | 0 (0)                     |           |
|                        |                                   |                            | M/M (8)         | 3 (37.5)               | 1 (12.5)   | 0 (0)           | 0 (0)               | 0 (0)         | 0 (0)                     |           |
|                        |                                   | 54-58                      | P/P (92)        | 37 (40.2)              | 14 (15.2)  | 7 (7.61)        | 0 (0)               | 2 (2.17)      | 4 (4.35)                  |           |
|                        |                                   |                            | M/M (22)        | 2 (9.09)               | 0 (0)      | 2 (9.09)        | 2 (9.09)            | 0 (0)         | 1 (4.55)                  |           |
|                        |                                   | 94-103                     | P/P (139)       | 59 (42.5)              | 18 (13.0)  | 12 (8.63)       | 1 (0.72)            | 7 (5.04)      | 0 (0)                     |           |
|                        |                                   |                            | M/M (7)         | 3 (42.9)               | 1 (14.3)   | 1 (14.3)        | 1 (14.3)            | 1 (14.3)      | 0 (0)                     |           |
|                        |                                   | 129-146                    | P/P (38)        | 19 (50.0)              | 9 (23.7)   | 7 (18.4)        | 4 (10.5)            | 2 (5.26)      | 4 (10.5)                  |           |
|                        |                                   |                            | M/M (5)         | 3 (60.0)               | 2 (40.0)   | 1 (20.0)        | 1 (20.0)            | 0 (0)         | 0 (0)                     |           |
|                        |                                   | 176-203                    | P/P (36)        | 5 (13.9)               | 2 (5.56)   | 1 (2.78)        | 2 (5.56)            | 0 (0)         | 3 (8.34)                  |           |
|                        |                                   |                            | M/M (0)         | n. a.                  | n. a.      | n. a.           | n. a.               | n. a.         | n. a.                     |           |
|                        |                                   | Longitudinal (90)          | -               | 1 <sup>st</sup> sample | P/P (90)   | 35 (39.8)       | 15 (17.1)           | 11 (12.5)     | 4 (4.6)                   | 2 (2.22)  |
| 2 <sup>nd</sup> sample |                                   |                            |                 | 33 (36.7)              | 12 (13.3)  | 8 (8.89)        | 3 (3.33)            | 1 (1.11)      | 9 (10.0)                  |           |

75 Different vaccines and combinations are abbreviated as follows: M/M (two-dose mRNA-1273), P/P (two-dose  
76 BNT162b2), A/A (two-dose AZD1222), A/M (first dose AZD1222, second dose mRNA-1273), A/P (first dose  
77 AZD1222, second dose BNT162b2) and J (one-dose Ad26.CoV2.S). The time points sample cohort contains only  
78 homologous BNT162b2 and mRNA-1273 samples. The longitudinal sample cohort contains only homologous  
79 BNT162b2 samples.

80 \* based on self-reported positive PCR/antigen test result at study centre visit and/or MULTICOV-AB  
81 nucleocapsid IgG S/CO ratio above 1

82

83 **Table S2.** MULTICOV-AB antigen panel.

| <b>Virus</b> | <b>Antigen</b>        | <b>Manufacturer</b> | <b>Product number</b> |
|--------------|-----------------------|---------------------|-----------------------|
| SARS-CoV-2   | Spike Trimer          | NMI                 | -                     |
| SARS-CoV-2   | RBD B.1 (wild-type)   | NMI                 | -                     |
| SARS-CoV-2   | Nucleocapsid          | Aalto               | 6404-b                |
| SARS-CoV-2   | RBD B.1.1.7 (Alpha)   | NMI                 |                       |
| SARS-CoV-2   | RBD B.1.351 (Beta)    | NMI                 |                       |
| SARS-CoV-2   | RBD P.3 (Gamma)       | NMI                 |                       |
| SARS-CoV-2   | RBD B.1.617.2 (Delta) | NMI                 |                       |
| hCoV-OC43    | S1 domain             | NMI                 | -                     |
| hCoV-OC43    | Nucleocapsid          | NMI                 | -                     |
| hCoV-HKU1    | S1 domain             | NMI                 | -                     |
| hCoV-HKU1    | Nucleocapsid          | NMI                 | -                     |
| hCoV-NL63    | S1 domain             | NMI                 | -                     |
| hCoV-NL63    | Nucleocapsid          | NMI                 | -                     |
| hCoV-229E    | S1 domain             | NMI                 | -                     |
| hCoV-229E    | Nucleocapsid          | NMI                 | -                     |

84 List of antigens included in MULTICOV-AB as well as their manufacturer and, if applicable, their product number.

85

86 **Table S3.** ACE2-RBD competition antigen panel.

| <b>Virus</b> | <b>Antigen</b>        | <b>Manufacturer</b> | <b>Amino acid exchanges in RBD</b> |
|--------------|-----------------------|---------------------|------------------------------------|
| SARS-CoV-2   | RBD B.1 (wild-type)   | NMI                 | -                                  |
| SARS-CoV-2   | RBD B.1.1.7 (Alpha)   | NMI                 | N501Y                              |
| SARS-CoV-2   | RBD B.1.351 (Beta)    | NMI                 | N501Y, E484K, K417N                |
| SARS-CoV-2   | RBD P.1 (Gamma)       | NMI                 | N501Y, E484K, K417T                |
| SARS-CoV-2   | RBD B.1.617.2 (Delta) | NMI                 | T478K, L452R                       |

87 List of antigens included in ACE2-RBD competition assay as well as their manufacturer, and the mutations  
88 covered within the RBD.

89 **Table S4.** Impact of confounders on ACE2 inhibition response towards SARS-CoV-2 wild-type and VoC RBDs.

| A. WT ACE2 binding inhibition, logit scale | P/P, n=734    |         | M/M, n=272    |         | A/P, n=114    |         | A/A, n=228    |         |
|--------------------------------------------|---------------|---------|---------------|---------|---------------|---------|---------------|---------|
|                                            | Est (sd)      | p-value | Est (sd)      | p-value | Est (sd)      | p-value | Est (sd)      | p-value |
| Intercept                                  | 3.50 (0.231)  | ---     | 3.39 (0.330)  | ---     | 3.07 (0.538)  | ---     | -0.52 (0.496) | ---     |
| Male                                       | -0.25 (0.103) | 0.014   | -0.05 (0.149) | 0.752   | -0.33(0.267)  | 0.218   | 0.30(0.152)   | 0.050   |
| Age (per 1 year)                           | -0.03 (0.003) | <0.001  | 0.00 (0.005)  | 0.431   | -0.01 (0.010) | 0.251   | 0.00(0.008)   | 0.960   |
| Days post-vaccination ( $\Delta T$ )       |               |         |               |         |               |         |               |         |
| 7-27                                       | Ref.          |         | Ref.          |         | Ref.          |         | Ref.          |         |
| 28-65                                      | -0.69 (0.104) | <0.001  | -0.97 (0.169) | <0.001  | -0.74 (0.260) | 0.005   | -0.10(0.188)  | 0.584   |
| Comorbidities                              |               |         |               |         |               |         |               |         |
| Cardiovascular                             | -0.12(0.158)  | 0.454   | -0.54 (0.309) | 0.083   | -0.03(0.424)  | 0.937   | 0.02 (0.241)  | 0.943   |
| Hypertension                               | 0.19 (0.119)  | 0.109   | -0.13 (0.180) | 0.480   | -0.08(0.301)  | 0.789   | 0.11(0.161)   | 0.485   |
| Diabetes                                   | -0.04 (0.185) | 0.808   | 0.58(0.386)   | 0.136   | 0.84(0.501)   | 0.095   | -0.15(0.242)  | 0.547   |
| Lung disease*                              | -0.03(0.187)  | 0.853   | 0.53(0.324)   | 0.104   | -0.87(0.513)  | 0.091   | -0.11(0.349)  | 0.758   |
| Cancer or Immunosuppression*               | -0.26(0.192)  | 0.176   | 0.29(0.362)   | 0.418   | 0.22(0.508)   | 0.662   | -0.61(0.368)  | 0.099   |

90

91



92

| B. Alpha ACE2 binding inhibition, logit scale | P/P, n=734   |         | M/M, n=272   |         | A/P, n=114   |         | A/A, n=228   |         |
|-----------------------------------------------|--------------|---------|--------------|---------|--------------|---------|--------------|---------|
|                                               | Est (sd)     | p-value | Est (sd)     | p-value | Est (sd)     | p-value | Est (sd)     | p-value |
| Intercept                                     | 2.50(0.211)  | ---     | 2.64(0.301)  | ---     | 2.26(0.465)  | ---     | -0.77(0.420) | ---     |
| Male                                          | -0.22(0.083) | 0.008   | -0.02(0.130) | 0.862   | -0.27(0.226) | 0.228   | 0.24(0.126)  | 0.060   |
| Age (per 1 year)                              | -0.02(0.003) | <0.001  | -0.01(0.004) | 0.218   | -0.01(0.009) | 0.270   | 0.00(0.006)  | 0.826   |
| Days post-vaccination ( $\Delta T$ )          |              |         |              |         |              |         |              |         |
| 7-27                                          | Ref.         |         | Ref.         |         | Ref.         |         | Ref.         |         |
| 28-65                                         | -0.56(0.083) | <0.001  | -0.89(0.147) | <0.001  | -0.58(0.219) | 0.008   | -.03(0.155)  | 0.842   |
| Comorbidities                                 |              |         |              |         |              |         |              |         |
| Cardiovascular                                | -0.10(0.125) | 0.434   | -0.42(0.266) | 0.112   | -0.02(0.361) | 0.961   | 0.04(0.202)  | 0.842   |
| Hypertension                                  | 0.16(0.095)  | 0.087   | -0.10(0.156) | 0.524   | -0.06(0.255) | 0.800   | 0.05(0.134)  | 0.715   |
| Diabetes                                      | -0.03(0.149) | 0.828   | 0.41(0.332)  | 0.216   | 0.81(0.425)  | 0.057   | -0.05(0.204) | 0.815   |
| Lung disease*                                 | -0.03(0.149) | 0.851   | 0.40(0.281)  | 0.156   | -0.78(0.433) | 0.073   | -0.08(0.288) | 0.789   |
| Cancer or Immunosuppression*                  | -0.15(0.153) | 0.343   | 0.21(0.314)  | 0.510   | 0.15(0.428)  | 0.724   | -0.45(0.302) | 0.139   |

93

94

| C. Beta ACE2 binding inhibition, logit scale | P/P, n=734   |         | M/M, n=272   |         | A/P, n=114   |         | A/A, n=228   |         |
|----------------------------------------------|--------------|---------|--------------|---------|--------------|---------|--------------|---------|
|                                              | Est (sd)     | p-value | Est (sd)     | p-value | Est (sd)     | p-value | Est (sd)     | p-value |
| Intercept                                    | 1.27(0.259)  | ---     | 1.55(0.309)  | ---     | 1.12(0.420)  | ---     | -1.18(0.432) | ---     |
| Male                                         | -0.19(0.070) | 0.006   | -0.08(0.105) | 0.448   | -0.27(0.180) | 0.131   | 0.11(0.116)  | 0.337   |
| Age (per 1 year)                             | -0.02(0.002) | <0.001  | 0.00(0.004)  | 0.170   | -0.01(0.007) | 0.268   | 0.00(0.006)  | 0.584   |
| Days post-vaccination ( $\Delta T$ )         |              |         |              |         |              |         |              |         |
| 7-27                                         | Ref.         |         | Ref.         |         | Ref.         |         | Ref.         |         |
| 28-65                                        | -0.44(0.070) | <0.001  | -0.86(0.119) | <0.001  | -0.59(0.175) | 0.001   | 0.07(0.144)  | 0.645   |
| Comorbidities                                |              |         |              |         |              |         |              |         |
| Cardiovascular                               | 0.00(0.106)  | 0.971   | -0.37(0.216) | 0.088   | -0.04(0.294) | 0.899   | 0.06(0.181)  | 0.741   |
| Hypertension                                 | 0.08(0.081)  | 0.306   | -0.12(0.126) | 0.323   | -0.02(0.205) | 0.923   | 0.01(0.122)  | 0.940   |
| Diabetes                                     | 0.01(0.124)  | 0.917   | 0.24(0.270)  | 0.380   | 0.48(0.345)  | 0.165   | 0.09(0.180)  | 0.636   |
| Lung disease*                                | -0.08(0.126) | 0.520   | 0.39(0.227)  | 0.087   | -0.54(0.346) | 0.117   | 0.10(0.268)  | 0.705   |
| Cancer or Immunosuppression*                 | -0.19(0.130) | 0.155   | 0.13(0.254)  | 0.606   | 0.27(0.340)  | 0.426   | -0.40(0.286) | 0.163   |

| D. Gamma ACE2 binding inhibition,<br>logit scale | P/P, n=734   |         | M/M, n=272   |         | A/P, n=114   |         | A/A, n=228   |         |
|--------------------------------------------------|--------------|---------|--------------|---------|--------------|---------|--------------|---------|
|                                                  | Est (sd)     | p-value | Est (sd)     | p-value | Est (sd)     | p-value | Est (sd)     | p-value |
| Intercept                                        | 1.31(0.169)  | ---     | 1.64(0.250)  | ---     | 1.24(0.377)  | ---     | -1.05(0.313) | ---     |
| Male                                             | -0.20(0.067) | 0.003   | -0.06(0.109) | 0.612   | -0.36(0.183) | 0.049   | 0.13(0.092)  | 0.165   |
| Age (per 1 year)                                 | -0.02(0.002) | <0.001  | 0.00(0.004)  | 0.222   | -0.01(0.007) | 0.183   | 0.00(0.005)  | 0.382   |
| Days post-vaccination ( $\Delta T$ )             |              |         |              |         |              |         |              |         |
| 7-27                                             | Ref.         |         | Ref.         |         | Ref.         |         | Ref.         |         |
| 28-65                                            | -0.46(0.068) | <0.001  | -0.91(0.124) | <0.001  | -0.52(0.177) | 0.004   | -0.03(0.114) | 0.769   |
| Comorbidities                                    |              |         |              |         |              |         |              |         |
| Cardiovascular                                   | -0.06(0.101) | 0.556   | -0.41(0.225) | 0.069   | -0.05(0.299) | 0.862   | 0.13(0.145)  | 0.352   |
| Hypertension                                     | 0.14(0.078)  | 0.063   | -0.08(0.132) | 0.548   | 0.04(0.208)  | 0.862   | 0.07(0.097)  | 0.496   |
| Diabetes                                         | -0.01(0.118) | 0.960   | 0.21(0.281)  | 0.463   | 0.53(0.351)  | 0.134   | 0.03(0.145)  | 0.821   |
| Lung disease*                                    | -0.04(0.121) | 0.770   | 0.27(0.237)  | 0.252   | -0.62(0.351) | 0.076   | -0.13(0.212) | 0.554   |
| Cancer or Immunosuppression*                     | -0.17(0.125) | 0.178   | 0.12(0.265)  | 0.654   | 0.17(0.344)  | 0.626   | -0.45(0.225) | 0.047   |

98

99

| E. Delta ACE2 binding inhibition, logit scale | P/P, n=734   |         | M/M, n=272   |         | A/P, n=114   |         | A/A, n=228   |         |
|-----------------------------------------------|--------------|---------|--------------|---------|--------------|---------|--------------|---------|
|                                               | Est (sd)     | p-value | Est (sd)     | p-value | Est (sd)     | p-value | Est (sd)     | p-value |
| Intercept                                     | 2.34(0.218)  | ---     | 2.53(0.312)  | ---     | 2.16(0.468)  | ---     | -1.10(0.430) | ---     |
| Male                                          | -0.21(0.085) | 0.013   | -0.03(0.135) | 0.830   | -0.34(0.226) | 0.132   | 0.20(0.128)  | 0.128   |
| Age (per 1 year)                              | -0.02(0.003) | <0.001  | 0.00(0.004)  | 0.349   | -0.01(0.009) | 0.203   | 0.00(0.007)  | 0.698   |
| Days post-vaccination ( $\Delta T$ )          |              |         |              |         |              |         |              |         |
| 7-27                                          | Ref.         |         | Ref.         |         | Ref.         |         | Ref.         |         |
| 28-65                                         | -0.55(0.086) | <0.001  | -0.99(0.152) | <0.001  | -0.70(0.220) | 0.001   | 0.01(0.159)  | 0.938   |
| Comorbidities                                 |              |         |              |         |              |         |              |         |
| Cardiovascular                                | -0.10(0.130) | 0.445   | -0.52(0.276) | 0.058   | 0.12(0.365)  | 0.744   | 0.09(0.203)  | 0.641   |
| Hypertension                                  | 0.15(0.099)  | 0.125   | -0.11(0.162) | 0.501   | 0.01(0.256)  | 0.957   | -0.04(0.136) | 0.762   |
| Diabetes                                      | -0.01(0.152) | 0.969   | 0.42(0.345)  | 0.227   | 0.68(0.429)  | 0.116   | -0.01(0.204) | 0.953   |
| Lung disease*                                 | -0.02(0.155) | 0.920   | 0.39(0.292)  | 0.182   | -0.67(0.434) | 0.125   | -0.15(0.295) | 0.604   |
| Cancer or Immunosuppression*                  | -0.18(0.159) | 0.261   | 0.17(0.326)  | 0.603   | 0.06(0.428)  | 0.888   | -0.50(0.311) | 0.111   |

101 ACE2 binding inhibition towards SARS-CoV-2 wild-type (A) and Alpha (B), Beta (C), Gamma (D), Delta (E) VoC in the mix and match sample cohort was modelled  
102 to assess the role of confounders (see methods for model details). Four samples (P/P) had missing information on comorbidities and were excluded from the analysis.  
103 Est=estimate, sd=standard deviation. Categories denoted with \* were merged in the sensitivity analysis including interaction terms with time post-vaccination due to  
104 limited sample sizes (selected results reported in the main text).

105 .

106

107 **Table S5.** Statistical comparison of antibody titres between vaccination schemes.

| Comparison X vs. Y |     | Full-length Spike trimer p'' (p-value) | RBD p'' (p-value) | S1 p'' (p-value) | S2 p'' (p-value) |
|--------------------|-----|----------------------------------------|-------------------|------------------|------------------|
| J                  | M/M | 0.91 (<0.001) *                        | 0.93 (<0.001) *   | 0.96 (<0.001) *  | 0.86 (<0.001) *  |
|                    | P/P | 0.89 (<0.001) *                        | 0.90 (<0.001) *   | 0.92 (<0.001) *  | 0.79 (<0.001) *  |
|                    | A/M | 0.89 (<0.001) *                        | 0.91 (<0.001) *   | 0.97 (<0.001) *  | 0.93 (<0.001) *  |
|                    | A/P | 0.90 (<0.001) *                        | 0.92 (<0.001) *   | 0.95 (<0.001) *  | 0.88 (<0.001) *  |
|                    | A/A | 0.63 (<0.080)                          | 0.74 (<0.001) *   | 0.86 (<0.001) *  | 0.81 (<0.001) *  |
| A/A                | M/M | 0.96 (<0.001) *                        | 0.94 (<0.001) *   | 0.93 (<0.001) *  | 0.57 (0.013) *   |
|                    | P/P | 0.91 (<0.001) *                        | 0.87 (<0.001) *   | 0.83 (<0.001) *  | 0.39 (<0.001) *  |
|                    | A/M | 0.93 (<0.001) *                        | 0.91 (<0.001) *   | 0.93 (<0.001) *  | 0.84 (<0.001) *  |
|                    | A/P | 0.93 (<0.001) *                        | 0.89 (<0.001) *   | 0.91 (<0.001) *  | 0.66 (<0.001) *  |
| A/P                | M/M | 0.60 (0.002) *                         | 0.64 (<0.001) *   | 0.55 (0.114)     | 0.38 (<0.001) *  |
|                    | P/P | 0.42 (0.012)                           | 0.49 (0.608)      | 0.34 (<0.001) *  | 0.21 (<0.001) *  |
|                    | A/M | 0.59 (0.204)                           | 0.59 (0.155)      | 0.69 (0.004) *   | 0.77 (<0.001) *  |
| A/M                | M/M | 0.50 (0.982)                           | 0.53 (0.623)      | 0.33 (0.014) *   | 0.16 (<0.001) *  |
|                    | P/P | 0.33 (0.014)                           | 0.40 (0.085)      | 0.18 (<0.001)*   | 0.09 (<0.001) *  |
| P/P                | M/M | 0.69 (<0.001) *                        | 0.64 (<0.001) *   | 0.72 (<0.001) *  | 0.71 (<0.001) *  |

108 Estimated probability (p'') that a random individual under one vaccination scheme in the mix and match sample  
109 cohort, has a larger titre than a random individual under another vaccination scheme. Brunner-Munzel was used  
110 to determine statistical significance with Holm's adjustment for multiple testing. For a comparison of a scheme X  
111 with a scheme Y, a significant p'' larger than ½ means that the vaccination-induced titres under Y tend to be  
112 higher and a significant p'' smaller than ½ means that the vaccination-induced titres under X tend to be higher.

113

114 **Table S6.** Statistical comparison of RBD antibody titres and wild-type ACE2 binding inhibition in recovered-  
 115 vaccinated and SARS-CoV-2 naïve-vaccinated individuals for different vaccination schemes

|                                         | <b>M/M<br/>p'' (p-value)</b> | <b>P/P<br/>p'' (p-value)</b> | <b>A/M<br/>p'' (p-value)</b> | <b>A/P<br/>p'' (p-value)</b> | <b>A/A<br/>p'' (p-value)</b> | <b>J<br/>p'' (p-value)</b> |
|-----------------------------------------|------------------------------|------------------------------|------------------------------|------------------------------|------------------------------|----------------------------|
| RBD                                     | 0.66<br>(0.074)              | 0.79<br>(<0.001)             | -- (only 1<br>convalescent)  | 0.79<br>(<0.001)             | 0.94<br>(<0.001)             | 0.98<br>(<0.001)           |
| AC2 binding<br>inhibition against<br>WT | 0.74<br>(0.016)              | 0.85<br>(<0.001)             | -- (only 1<br>convalescent)  | 0.84<br>(0.004)              | 0.97<br>(<0.001)             | 0.98<br>(<0.001)           |

116 Estimated probability (p'') that a random recovered-vaccinated individual has a larger titre than a random SARS-  
 117 CoV-2 naïve vaccinated individual under the respective vaccination scheme. Statistical analysis was determined  
 118 by Brunner-Munzel. A significant p'' larger than ½ means that the vaccination-induced titres tend to be higher in  
 119 recovered-vaccinated individuals.

120

121

122
